# Supplementary material
Source: PubMed Central journal article supplement (PMC6339564)
Supplement: NIHMS1515590-supplement-Supplemental_Material.pdf [file NIHMS1515590-supplement-Supplemental_Material.pdf]

## SUPPLEMENTAL MATERIAL

### **MiR-192-5p in the Kidney Protects Against the Development of Hypertension**

Maria Angeles Baker, PhD<sup>1</sup>, Feng Wang, MD<sup>1,2</sup>, Yong Liu, PhD<sup>1</sup>, Alison J. Kriegel, PhD<sup>1</sup>, Aron M. Geurts, PhD<sup>1</sup>, Kristie Usa<sup>1</sup>, Hong Xue, PhD<sup>1</sup>, Dandan Wang<sup>1</sup>, Yiwei Kong<sup>1,2</sup>, Mingyu Liang, MB, PhD<sup>1,\*</sup>

<sup>1</sup>Center of Systems Molecular Medicine, Department of Physiology, Medical College of Wisconsin, Milwaukee, WI 53226, USA; <sup>2</sup>Department of Nephrology, Shanghai Jiao Tong University Affiliated Sixth People's Hospital, Shanghai, China

Running title: Renal miR-192 in Hypertension

\*Correspondence to:

Mingyu Liang, MB, PhD  
8701 Watertown Plank Road  
Milwaukee, WI 53226  
Phone: (414) 955-8539  
Fax: (414) 955-6546  
[mliang@mcw.edu](mailto:mliang@mcw.edu)

**Table S1. Clinical characteristics of the patients involved in the kidney biopsy analysis.** Scr, serum creatinine; BUN, blood nitrogen urea; eGFR, estimated GFR; SBP, systolic blood pressure; DBP, diastolic blood pressure; ARB, angiotensin II receptor blocker; CCB, calcium channel blocker; ACEI, angiotensin converting enzyme inhibitor. Data shown are mean  $\pm$  SEM. \*,  $p < 0.05$  vs. control subjects. Reproduced with permission from ref. 22.

| Group                                                                       | Control subjects                         | Hypertension                             | Hypertensive Nephrosclerosis                                                                                                  |
|-----------------------------------------------------------------------------|------------------------------------------|------------------------------------------|-------------------------------------------------------------------------------------------------------------------------------|
| n                                                                           | 10                                       | 8                                        | 32                                                                                                                            |
| Age (year)                                                                  | 44.9 $\pm$ 6.1                           | 48.5 $\pm$ 6.6                           | 53.9 $\pm$ 2.0                                                                                                                |
| Gender                                                                      | 4 M, 6 F                                 | 4 M, 4 F                                 | 18 M, 14 F                                                                                                                    |
| Race                                                                        | Asian                                    | Asian                                    | Asian                                                                                                                         |
| Pathological findings                                                       | Minimal or mild arteriolonephrosclerosis | Minimal or mild Arteriolonephrosclerosis | Moderate to severe arterial or arteriolar nephrosclerosis consistent with hypertensive nephropathy; no other kidney pathology |
| Scr (mg/dL)                                                                 | 1.0 $\pm$ 0.1                            | 1.1 $\pm$ 0.1                            | 1.4 $\pm$ 0.1                                                                                                                 |
| BUN (mg/dL)                                                                 | 17.2 $\pm$ 1.2                           | 19.8 $\pm$ 3.3                           | 20.5 $\pm$ 1.2                                                                                                                |
| eGFR (ml/min)                                                               | 87.9 $\pm$ 10.1                          | 81.3 $\pm$ 11.3                          | 70.6 $\pm$ 6.4                                                                                                                |
| SBP last visit (mmHg)                                                       | 120 $\pm$ 3                              | 137 $\pm$ 7*                             | 147 $\pm$ 4*                                                                                                                  |
| DBP last visit (mmHg)                                                       | 77 $\pm$ 3                               | 86 $\pm$ 3*                              | 92 $\pm$ 3*                                                                                                                   |
| SBP last 3 visits (mmHg)                                                    | 114 $\pm$ 2                              | 142 $\pm$ 4*                             | 144 $\pm$ 3*                                                                                                                  |
| DBP last 3 visits (mmHg)                                                    | 73 $\pm$ 1                               | 87 $\pm$ 2*                              | 90 $\pm$ 3*                                                                                                                   |
| Anti-hypertensive medications (number of patients; some taking two or more) | None                                     | ARB (6), CCB (3)                         | CCB (20), ARB (14), $\alpha/\beta$ blocker (4), ACEI (3), $\beta$ blocker (2), diuretics (2), $\alpha$ blocker (1)            |
| Diabetes mellitus                                                           | 0                                        | 2*                                       | 7*                                                                                                                            |

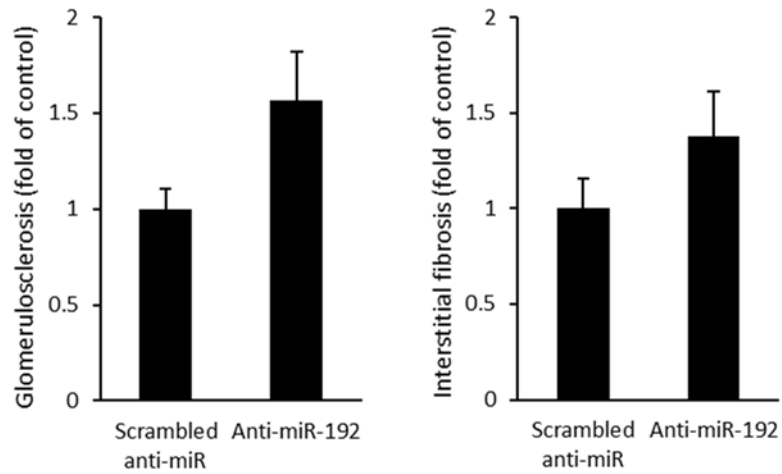

**Figure S1. Glomerulosclerosis and renal interstitial fibrosis in L26 rats treated with anti-miR-192-5p or control anti-miR.** Kidney sections from the rats whose blood pressure was shown in Figure 2C were examined. N=6 and 8.

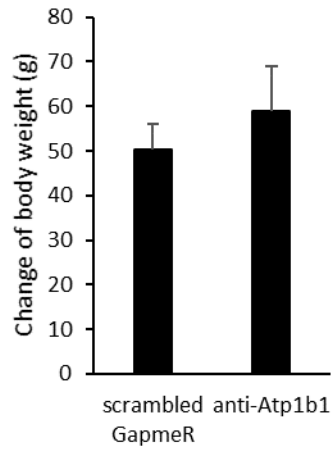

**Figure S2. Body weight in L26 rats treated with anti-miR-192-5p and scrambled or anti-Atp1b1 GapmeR.** Body weight was measured on the day that the renal artery injection was performed and the last day of the experiment in the double knockdown study depicted in Figure 4D. Changes in body weight between the two time points, which likely reflected growth over the 17-day period primarily, are plotted here. N=4.

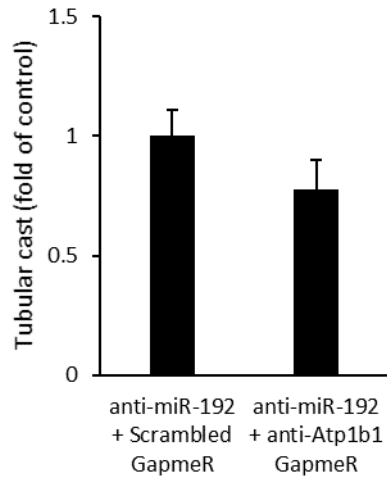

**Figure S3. Tubular cast in L26 rats treated with anti-miR-192-5p and scrambled or anti-Atp1b1 GapmeR.** Kidney sections from rats whose blood pressure was shown in Figure 4D were examined. N=4.
